# Supplementary material for: Prognostic Value of Simple Non-Invasive Tests for the Risk Stratification of Incident Hepatocellular Carcinoma in Cirrhotic Individuals with Non-Alcoholic Fatty Liver Disease
Source: MDPI journal article supplement (doi:10.3390/cancers15061659), 2023-03-08

Supplementary Material

# Prognostic Value of Simple Non-Invasive Tests for the Risk Stratification of Incident Hepatocellular Carcinoma in Cirrhotic Individuals with Non-Alcoholic Fatty Liver Disease

Angelo Armandi <sup>1,2,†</sup>, Gian Paolo Caviglia <sup>1,†</sup>, Amina Abdulle <sup>1</sup>, Chiara Rosso <sup>1</sup>, Kamela Gjini <sup>1</sup>, Gabriele Castelnuevo <sup>1</sup>, Marta Guariglia <sup>1</sup>, Nuria Perez Diaz del Campo <sup>1</sup>, Daphne D'Amato <sup>1</sup>, Davide Giuseppe Ribaldone <sup>1</sup>, Giorgio Maria Saracco <sup>1</sup> and Elisabetta Bugianesi <sup>1,\*</sup>

<sup>1</sup> Department of Medical Sciences, University of Turin, 10126 Turin, Italy

<sup>2</sup> Metabolic Liver Disease Research Program, University Medical Center, Department of Internal Medicine I, Johannes Gutenberg University, 55131 Mainz, Germany

\* Correspondence: elisabetta.bugianesi@unito.it

† These authors equally contributed to the manuscript.

**Table S1.** Cumulative probability and hazard ratios of HCC by AAR, APRI, and BARD risk category.

| NITs         | HCC (n) | Cumulative (%) | <i>p</i> value <sup>1</sup> | HR (95% CI)       | <i>p</i> value <sup>2</sup> |
|--------------|---------|----------------|-----------------------------|-------------------|-----------------------------|
| AAR T1       | 2/41    | 4.9%           | 0.204                       | 2.03 (0.87–4.71)  | 0.204                       |
| AAR T2       | 6/40    | 15.0%          |                             |                   |                             |
| AAR T3       | 5/41    | 12.1%          |                             |                   |                             |
| APRI <0.5    | 1/32    | 3.1%           | 0.062                       | 3.41 (0.89–13.03) | 0.073                       |
| APRI 0.5–1.5 | 10/79   | 12.7%          |                             |                   |                             |
| APRI >1.5    | 2/11    | 18.2%          |                             |                   |                             |
| BARD 0–1     | 1/20    | 5.0%           | 0.820                       | 1.19 (0.49–2.86)  | 0.703                       |
| BARD 2–3     | 8/66    | 12.1%          |                             |                   |                             |
| BARD 4       | 4/36    | 11.1%          |                             |                   |                             |

<sup>1</sup> *p* value was calculated by log-rank test. <sup>2</sup> *p* value was calculated by Cox regression analysis. Abbreviations: AAR, AST to ALT ratio; APRI, AST to platelets ratio index; BARD, body mass index, AST/ALT ratio, diabetes mellitus score; CI, confidence interval; HCC, hepatocellular carcinoma; HR, hazard ratio; *n*, number.

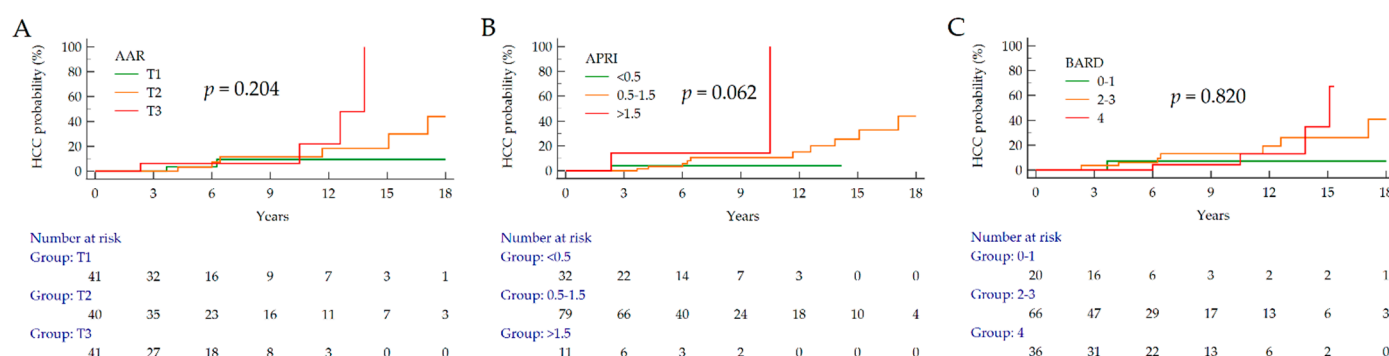

Supplement: s1 [file s1]
